# Supplementary material
Source: PubMed Central journal article supplement (PMC6628689)
Supplement: NIHMS1037128-supplement-SI.pdf [file NIHMS1037128-supplement-SI.pdf]

## Supporting information

### **Predicting Ion Mobility Collision Cross Sections Using a Deep Neural Network: DeepCCS**

Pier-Luc Plante<sup>1, 2, 3</sup>, Élina Francovic-Fontaine<sup>1, 2</sup>, Jody C. May<sup>4</sup>, John A. McLean<sup>4</sup>, Erin S. Baker<sup>5</sup>, François Laviolette<sup>1</sup>, Mario Marchand<sup>1</sup>, Jacques Corbeil<sup>1, 2, 3</sup>

<sup>1</sup> Big Data Research Centre, Université Laval, Qc, G1V 0A6, Canada

<sup>2</sup> Centre de Recherche en Infectiologie de l'Université Laval, Axe Maladies Infectieuses et Immunitaires, Centre de Recherche du CHU de Québec-Université Laval, Québec City, G1V 4G2, Canada

<sup>3</sup> Département de médecine moléculaire, Faculté de médecine, Université Laval, Québec City, G1V 0A6, Canada

<sup>4</sup> Department of Chemistry, Center for Innovative Technology, Vanderbilt University, Nashville, Tennessee 37235, United States

<sup>5</sup> Department of Chemistry, North Carolina State University, Raleigh, North Carolina 27695, United States.

\*Corresponding Author: Jacques Corbeil ([jacques.corbeil@fmed.ulaval.ca](mailto:jacques.corbeil@fmed.ulaval.ca))

## Table of content

|                                                                                                                |    |
|----------------------------------------------------------------------------------------------------------------|----|
| Method supplementary information.....                                                                          | 1  |
| Outliers description .....                                                                                     | 1  |
| Figure S1 Repeat measurements of the IM spectra and CCS values. ....                                           | 3  |
| Table S1. Possible CNN hyper-parameters values during the random-search cross-validation.....                  | 4  |
| Table S2. CNN multi-output model performances on the HMDB molecular properties prediction problem.....         | 4  |
| Table S3. DeepCCS neural network structure .....                                                               | 5  |
| Table S4. CNN structure for HMDB chemical properties prediction .....                                          | 6  |
| Table S5. Effect of repetitive SMILES-ion combination on the single split experiment.....                      | 8  |
| Table S6. ClassyFire classification at the class level of the datasets used to train and test DeepCCS .....    | 9  |
| Table S7. ClassyFire classification at the subclass level of the datasets used to train and test DeepCCS ..... | 11 |

## Method supplementary information

The five-fold cross-validation was performed using only the training set, trying a total of 340 different combinations for a total of 1700 different models trained. The complete list of hyper-parameters that were tested and their range are available in **Table S1**. The hyperparameter combination giving the best cross-validation score was kept. Finally, the last maximum pooling layer stride parameter was increased to 2 in order to reduce the total number of learnable parameters in the network. During training, the Adam optimizer was used with a learning rate of  $1e^{-4}$  for 150 epochs and a batch size of 2. Further details about the neural network structure can be found in **Table S3** and on the github repositories available at [github.com/plpla/DeepCCS](https://github.com/plpla/DeepCCS) and [github.com/plpla/DeepCCS\\_paper](https://github.com/plpla/DeepCCS_paper).

## Outliers description

Five outliers are visible in Figure 5 of the manuscript. Here, we describe each outlier with either a confirmed or highly probable explanation.

- A. Name: Methyl behenate  
Class: Lipid  
Ion: M-H  
Reference CCS: 156.1 Å<sup>2</sup>  
DeepCCS: 192.7 Å<sup>2</sup>  
Explanation: A repeated measurement of methyl behenate using the standardized CCS measurement protocol described by Stow et al. (*Analytical Chemistry* 89(17), 9048-9055, 2017) gives a CCS value of 186.2 Å<sup>2</sup> (**Figure S1-A**). This confirms the reference value error.
- B. Name: 1,2-Diacyl-sn-glycero 3-phosphocholine  
Class: Lipid  
Ion: M+H  
Reference CCS: 189.6 Å<sup>2</sup>  
DeepCCS: 251.0 Å<sup>2</sup>  
Explanation: A similar lipid (PC 34:2), the double bound unspecified form of 1,2-Diacyl-sn-glycero 3-phosphocholine, was measured with a CCS value of 279.5 Å<sup>2</sup> (**Figure S1-B**), a value closer to the predicted value. A low abundance ion signal appears at lower CCS and it is suspected that a similar signal artifact is the source of the reference value error.
- C. Name: D-Maltose  
Class: Sugar  
Ion: M-H  
Reference CCS: 205.9 Å<sup>2</sup>  
DeepCCS: 169.1 Å<sup>2</sup>  
Explanation: A repeated measurement of D-maltose gives a CCS value of 168.8 Å<sup>2</sup> (**Figure S1-C**). This updated measurement is very close to the DeepCCS prediction and confirms the reference value error. Carbohydrates are prone to aggregation, and these multimers readily dissociate during transfer from the IM to the MS stage, resulting in multiple ion signals appearing at higher CCS values (c.f.,

**Figure S1-C).** It is suspected that the large CCS reported for the reference value is in fact a multimer signal.

D. Name: Sophorose

Class: Sugar

Ion: M-H

Reference CCS: 187.1 Å<sup>2</sup>

DeepCCS: 168.7 Å<sup>2</sup>

Explanation: As was observed with D-maltose (above) it is believed that the large discrepancy between the reference and predicted CCS values for sophorose is due to an aggregate that dissociated into the monomer mass prior to the MS measurement, although no measurements are available to confirm this hypothesis.

E. Name: L-Threonine

Class: Amino acid

Ion: M-H

Reference CCS: 141.4 Å<sup>2</sup>

DeepCCS: 125.1 Å<sup>2</sup>

Explanation: The reference CCS value is higher than other amino acids reported in the reference set. A repeated IM measurement of L-threonine gives a CCS value of 127.6 Å<sup>2</sup> (**Figure S1-D**), which is much closer to the predicted value. This confirms the reference error. L-threonine exhibits several high CCS artifacts in the IM spectrum (c.f., **Figure S1-D**), and these are likely the source of the erroneously high reference CCS.

**(A) Methyl Behenate (C<sub>23</sub>H<sub>46</sub>O<sub>2</sub>)**[M-H]<sup>-</sup> = 353.3419 Da (measured = 353.3412; 2.1 ppm)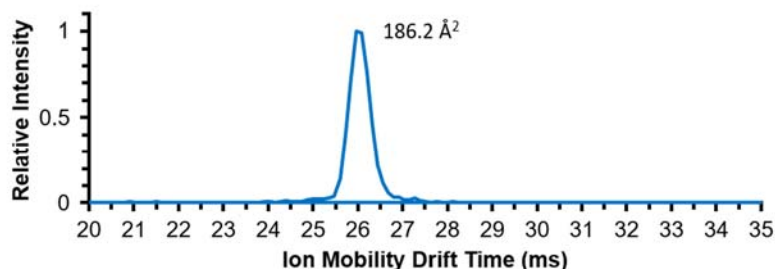

|                 | <sup>DT</sup> CCS <sub>N<sub>2</sub></sub><br>(Å <sup>2</sup> ) |
|-----------------|-----------------------------------------------------------------|
| 1               | 185.9                                                           |
| 2               | 186.3                                                           |
| 3               | 186.3                                                           |
| 4               | 186.4                                                           |
| 5               | 186.2                                                           |
| 6               | 186.1                                                           |
| 7               | 185.9                                                           |
| Average=        | <b>186.2</b>                                                    |
| Std. Deviation= | <b>0.2</b>                                                      |

**(B) Phosphatidylcholine 34:2 (C<sub>42</sub>H<sub>80</sub>NO<sub>8</sub>P)**[M+H]<sup>+</sup> = 758.5699 Da (measured = 758.5665; 4.5 ppm)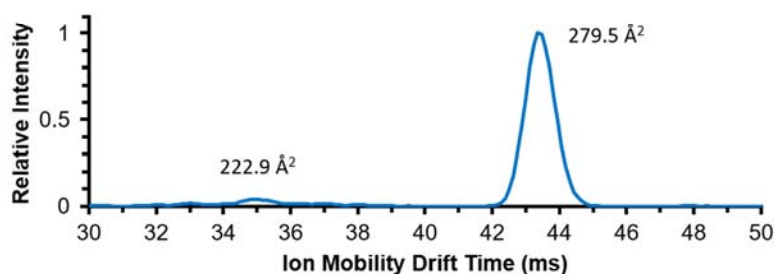

|                 | <sup>DT</sup> CCS <sub>N<sub>2</sub></sub><br>(Å <sup>2</sup> ) |
|-----------------|-----------------------------------------------------------------|
| 1               | 278.8                                                           |
| 2               | 280.6                                                           |
| 3               | 279.4                                                           |
| 4               | 279.0                                                           |
| 5               | 279.9                                                           |
| 6               | 279.2                                                           |
| 7               | 279.4                                                           |
| Average=        | <b>279.5</b>                                                    |
| Std. Deviation= | <b>0.6</b>                                                      |

**(C) D-Maltose (C<sub>12</sub>H<sub>22</sub>O<sub>11</sub>)**[M-H]<sup>-</sup> = 341.1084 Da (measured = 341.1088; 1.2 ppm)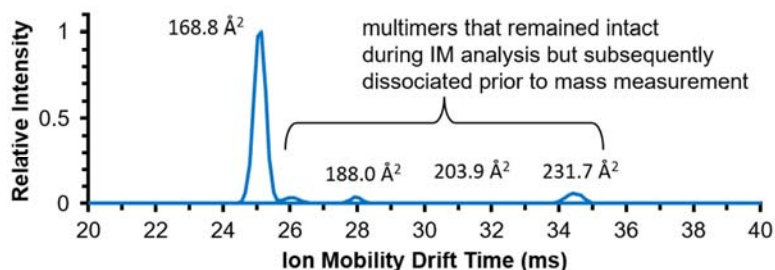

|                 | <sup>DT</sup> CCS <sub>N<sub>2</sub></sub><br>(Å <sup>2</sup> ) |
|-----------------|-----------------------------------------------------------------|
| 1               | 168.6                                                           |
| 2               | 168.9                                                           |
| 3               | 169.1                                                           |
| 4               | 169.0                                                           |
| 5               | 168.9                                                           |
| 6               | 168.7                                                           |
| 7               | 168.6                                                           |
| Average=        | <b>168.8</b>                                                    |
| Std. Deviation= | <b>0.2</b>                                                      |

**(D) L-Threonine (C<sub>4</sub>H<sub>9</sub>NO<sub>3</sub>)**[M+H]<sup>+</sup> = 120.0661 Da (measured = 120.0657; 3.0 ppm)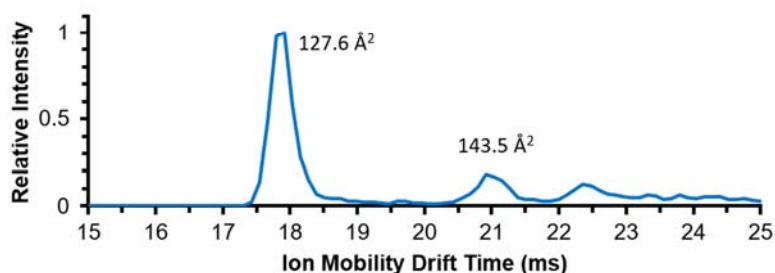

|                 | <sup>DT</sup> CCS <sub>N<sub>2</sub></sub><br>(Å <sup>2</sup> ) |
|-----------------|-----------------------------------------------------------------|
| 1               | 127.5                                                           |
| 2               | 127.6                                                           |
| 3               | 127.8                                                           |
| 4               | 127.7                                                           |
| 5               | 127.6                                                           |
| 6               | 127.5                                                           |
| 7               | 127.5                                                           |
| Average=        | <b>127.6</b>                                                    |
| Std. Deviation= | <b>0.1</b>                                                      |

**Figure S1.** Repeat measurements of the IM spectra and CCS values for **(A)** methyl behenate, **(B)** PC 34:2, **(C)** D-maltose, and **(D)** L-threonine.

**Table S1. Possible CNN hyper-parameters values during the random-search cross-validation**

| Parameter                    | Values              |
|------------------------------|---------------------|
| Max. number of epochs        | 50, 100 or 150      |
| Batch size                   | 2, 5, 10, 15 or 20  |
| Dropout rate                 | 0.0 to 0.5          |
| Number of convolution layers | Between 1 and 10    |
| Convolution layer width      | 64, 128, 256 or 384 |
| Convolution filter size      | 3, 4 or 5           |
| Maximum pooling filter size  | 2, 3 or 4           |
| Number of dense layers       | Between 1 and 10    |
| Dense layers width           | 64, 128, 256 or 384 |
| Add normalization layer      | True or False       |

**Table S2. CNN multi-output model performances on the HMDB molecular properties prediction problem**

| Property           | R <sup>2</sup> | Median relative error (%) |
|--------------------|----------------|---------------------------|
| Polar surface area | 0.9998         | 0.1670                    |
| logS               | 0.9860         | -0.6311                   |
| Refractivity       | 0.9999         | 0.0995                    |
| Polarizability     | 0.9997         | 0.2005                    |
| logP (ALOGPS)      | 0.9891         | 0.6419                    |
| logP (Chemaxon)    | 0.9966         | 0.1574                    |

**Table S3. DeepCCS neural network structure**

| Layer (type)                   | Output Shape    | Param # | Connected to                  |
|--------------------------------|-----------------|---------|-------------------------------|
| smile (InputLayer)             | (None, 250, 37) | 0       |                               |
| conv1d_1 (Conv1D)              | (None, 247, 64) | 9536    | smile[0][0]                   |
| conv1d_2 (Conv1D)              | (None, 244, 64) | 16448   | conv1d_1[0][0]                |
| max_pooling1d_1 (MaxPooling1D) | (None, 243, 64) | 0       | conv1d_2[0][0]                |
| conv1d_3 (Conv1D)              | (None, 240, 64) | 16448   | max_pooling1d_1[0][0]         |
| max_pooling1d_2 (MaxPooling1D) | (None, 239, 64) | 0       | conv1d_3[0][0]                |
| conv1d_4 (Conv1D)              | (None, 236, 64) | 16448   | max_pooling1d_2[0][0]         |
| max_pooling1d_3 (MaxPooling1D) | (None, 235, 64) | 0       | conv1d_4[0][0]                |
| conv1d_5 (Conv1D)              | (None, 232, 64) | 16448   | max_pooling1d_3[0][0]         |
| max_pooling1d_4 (MaxPooling1D) | (None, 231, 64) | 0       | conv1d_5[0][0]                |
| conv1d_6 (Conv1D)              | (None, 228, 64) | 16448   | max_pooling1d_4[0][0]         |
| max_pooling1d_5 (MaxPooling1D) | (None, 227, 64) | 0       | conv1d_6[0][0]                |
| conv1d_7 (Conv1D)              | (None, 224, 64) | 16448   | max_pooling1d_5[0][0]         |
| max_pooling1d_6 (MaxPooling1D) | (None, 112, 64) | 0       | conv1d_7[0][0]                |
| flatten_1 (Flatten)            | (None, 7168)    | 0       | max_pooling1d_6[0][0]         |
| adduct (InputLayer)            | (None, 4)       | 0       |                               |
| concatenate_1 (Concatenate)    | (None, 7172)    | 0       | flatten_1[0][0], adduct[0][0] |
| dense_1 (Dense)                | (None, 384)     | 2754432 | concatenate_1[0][0]           |
| dense_2 (Dense)                | (None, 384)     | 147840  | dense_1[0][0]                 |
| dense_3 (Dense)                | (None, 1)       | 385     | dense_2[0][0]                 |

**Table S4. CNN structure for HMDB chemical properties prediction**

| Layer           | (type)         | Output Shape     | Param # | Connect to            |
|-----------------|----------------|------------------|---------|-----------------------|
| smiles          | (InputLayer)   | (None, 250, 58)  | 0       |                       |
| conv1d_1        | (Conv1D)       | (None, 247, 64)  | 14912   | smiles[0][0]          |
| conv1d_2        | (Conv1D)       | (None, 244, 64)  | 16448   | conv1d_1[0][0]        |
| max_pooling1d_1 | (MaxPooling1D) | (None,243, 64)   | 0       | conv1d_2[0][0]        |
| conv1d_3        | (Conv1D)       | (None, 240, 64)  | 16448   | max_pooling1d_1[0][0] |
| max_pooling1d_2 | (MaxPooling1D) | (None, 239, 64)  | 0       | conv1d_3[0][0]        |
| conv1d_4        | (Conv1D)       | (None, 236, 64)  | 16448   | max_pooling1d_2[0][0] |
| max_pooling1d_3 | (MaxPooling1D) | (None, 235 , 64) | 0       | conv1d_4[0][0]        |
| conv1d_5        | (Conv1D)       | (None, 232, 64)  | 16448   | max_pooling1d_3[0][0] |
| max_pooling1d_4 | (MaxPooling1D) | (None, 231 , 64) | 0       | conv1d_5[0][0]        |
| conv1d_6        | (Conv1D)       | (None, 228, 64)  | 16448   | max_pooling1d_4[0][0] |
| max_pooling1d_5 | (MaxPooling1D) | (None,227, 64)   | 0       | conv1d_6[0][0]        |
| conv1d_7        | (Conv1D)       | (None, 223, 64)  | 16448   | max_pooling1d_5[0][0] |
| max_pooling1d_6 | (MaxPooling1D) | (None, 112, 64)  | 0       | conv1d_7[0][0]        |
| flatten_1       | (Flatten)      | (None, 7168)     | 0       | max_pooling1d_6[0][0] |
| dense_1         | (Dense)        | (None, 384)      | 2752896 | flatten_1[0][0]       |
| dense_3         | (Dense)        | (None, 384)      | 2752896 | flatten_1[0][0]       |



|                    |         |             |         |                 |
|--------------------|---------|-------------|---------|-----------------|
| dense_5            | (Dense) | (None, 384) | 2752896 | flatten_1[0][0] |
| dense_7            | (Dense) | (None, 384) | 2752896 | flatten_1[0][0] |
| dense_9            | (Dense) | (None, 384) | 2752896 | flatten_1[0][0] |
| dense_11           | (Dense) | (None, 384) | 2752896 | flatten_1[0][0] |
| dense_2            | (Dense) | (None, 384) | 147840  | dense_1[0][0]   |
| dense_4            | (Dense) | (None, 384) | 147840  | dense_3[0][0]   |
| dense_6            | (Dense) | (None, 384) | 147840  | dense_5[0][0]   |
| dense_8            | (Dense) | (None, 384) | 147840  | dense_7[0][0]   |
| dense_10           | (Dense) | (None, 384) | 147840  | dense_9[0][0]   |
| dense_12           | (Dense) | (None, 384) | 147840  | dense_11[0][0]  |
| polar_surface_area | (Dense) | (None, 1)   | 385     | dense_2[0][0]   |
| logs               | (Dense) | (None, 1)   | 385     | dense_4[0][0]   |
| refractivity       | (Dense) | (None, 1)   | 385     | dense_6[0][0]   |
| polarizability     | (Dense) | (None, 1)   | 385     | dense_8[0][0]   |
| logp_alogps        | (Dense) | (None, 1)   | 385     | dense_10[0][0]  |
| logp_chemaxon      | (Dense) | (None, 1)   | 385     | dense_12[0][0]  |

**Table S5. Effect of repetitive SMILES-ion combination on the single split experiment**

| Dataset             | Single split         |                           | Single split no repetitions |                           |
|---------------------|----------------------|---------------------------|-----------------------------|---------------------------|
|                     | R <sup>2</sup>       | Median relative error (%) | R <sup>2</sup>              | Median relative error (%) |
| <b>Global</b>       | <b>0.976 (0.001)</b> | <b>2.67 (0.18)</b>        | <b>0.976 (0.001)</b>        | <b>2.67 (0.18)</b>        |
| MetCCS Agilent pos. | 0.960 (0.005)        | 2.02 (0.24)               | 0.957 (0.006)               | 2.50 (0.12)               |
| MetCCS Agilent neg. | 0.969 (0.005)        | 3.11 (0.49)               | 0.978 (0.005)               | 2.87 (0.53)               |
| Astarita pos.       | 0.901 (0.013)        | 4.86 (0.30)               | 0.901 (0.011)               | 5.05 (0.33)               |
| Astarita neg.       | 0.955 (0.006)        | 3.13 (0.48)               | 0.961 (0.005)               | 3.11 (0.44)               |
| Baker               | 0.954 (0.006)        | 2.43 (0.11)               | 0.948 (0.008)               | 2.64 (0.11)               |
| McLean              | 0.995 (0.001)        | 1.49 (0.14)               | 0.992 (0.001)               | 1.71 (0.20)               |
| CBM 2018            | 0.930 (0.010)        | 2.26 (0.28)               | 0.930 (0.010)               | 2.26 (0.28)               |
| Repetitives         | -                    | -                         | 0.960 (0.005)               | 2.69 (0.34)               |

**Table S6. ClassyFire classification at the class level of the datasets used to train and test DeepCCS**

| Class                                  | Number | Class                                    | Number |
|----------------------------------------|--------|------------------------------------------|--------|
| Flavonoids                             | 17     | Tetracyclines                            | 1      |
| Ergoline and derivatives               | 1      | Organic phosphonic acids and derivatives | 1      |
| Pyrimidine nucleotides                 | 18     | Nucleoside and nucleotide analogues      | 1      |
| ('Unknown                              | 2      | Harmala alkaloids                        | 1      |
| 6,7-benzomorphans                      | 1      | Benzothiadiazoles                        | 1      |
| Strychnos alkaloids                    | 1      | Keto acids and derivatives               | 7      |
| Fatty Acyls                            | 92     | Diarylheptanoids                         | 1      |
| Glycerophospholipids                   | 38     | Pyridine nucleotides                     | 2      |
| Isoflavonoids                          | 6      | Glycerolipids                            | 3      |
| Organofluorides                        | 3      | Organic phosphoric acids and derivatives | 5      |
| Diazanaphthalenes                      | 2      | Piperidines                              | 7      |
| Pyridines and derivatives              | 22     | Diazines                                 | 12     |
| Imidazothiazoles                       | 1      | Tetrahydroisoquinolines                  | 1      |
| Triazines                              | 3      | Carboxylic acids and derivatives         | 211    |
| Thioethers                             | 1      | Lactones                                 | 3      |
| Organic sulfuric acids and derivatives | 2      | Benzothiopyrans                          | 5      |
| Pyrrolopyrazines                       | 1      | Azoles                                   | 14     |
| Anthracenes                            | 3      | Tetrapyrroles and derivatives            | 5      |
| Benzofurans                            | 1      | Organic sulfonic acids and derivatives   | 1      |
| Organoxygen compounds                  | 135    | Purine nucleosides                       | 14     |
| Piperazinoazepines                     | 2      | Carboximidic acids and derivatives       | 2      |
| Indanes                                | 1      | Cycloheptathiophenes                     | 1      |
| 5'-deoxyribonucleosides                | 4      | Pyrimidine nucleosides                   | 9      |
| Dibenzocycloheptenes                   | 5      | Oxazinanes                               | 1      |
| Ribonucleoside 3'-phosphates           | 1      | Benzene and substituted derivatives      | 134    |
| Phenols                                | 21     | Imidazopyrimidines                       | 23     |
| Indenes and isoindenes                 | 1      | Cinnamaldehydes                          | 1      |
| Biotin and derivatives                 | 1      | Lactams                                  | 1      |
| Benzodioxoles                          | 6      | Phenanthrenes and derivatives            | 5      |
| Tetralins                              | 1      | Dithiolanes                              | 1      |

|                                                |    |                                        |    |
|------------------------------------------------|----|----------------------------------------|----|
| ('Unclassified                                 | 54 | Organic carbonic acids and derivatives | 2  |
| Cinnamic acids and derivatives                 | 6  | Peptidomimetics                        | 7  |
| Yohimbine alkaloids                            | 2  | Stilbenes                              | 2  |
| Benzazepines                                   | 8  | Benzoxazoles                           | 1  |
| Purine nucleotides                             | 30 | Morphinans                             | 12 |
| Benzoxazepines                                 | 2  | Indoles and derivatives                | 36 |
| Polypeptides                                   | 7  | Naphthalenes                           | 8  |
| Organonitrogen compounds                       | 29 | Coumarins and derivatives              | 3  |
| Pyrroles                                       | 3  | Thienodiazepines                       | 1  |
| Phenol ethers                                  | 10 | Quinolines and derivatives             | 6  |
| Organic oxoanionic compounds                   | 2  | Benzothiazepines                       | 3  |
| Isoquinolines and derivatives                  | 1  | Benzimidazoles                         | 2  |
| Benzocycloheptapyridines                       | 2  | Dihydrofurans                          | 1  |
| Phenylpropanoic acids                          | 5  | Flavin nucleotides                     | 2  |
| Imidazole ribonucleosides and ribonucleotides  | 1  | Amaryllidaceae alkaloids               | 1  |
| Organic dithiophosphoric acids and derivatives | 1  | Benzodiazepines                        | 32 |
| Phthalide isoquinolines                        | 1  | Non-metal oxoanionic compounds         | 1  |
| Pyridopyrimidines                              | 2  | Cinchona alkaloids                     | 2  |
| Macrolactams                                   | 1  | Steroids and steroid derivatives       | 54 |
| Benzothiepins                                  | 1  | Hydroxy acids and derivatives          | 7  |
| Diazinanes                                     | 10 | (5'→5'-dinucleotides                   | 6  |
| Linear 1,3-diarylpropanoids                    | 3  | Tropane alkaloids                      | 1  |
| Benzoxepines                                   | 2  | Pteridines and derivatives             | 10 |
| Sphingolipids                                  | 5  | Benzopyrans                            | 2  |
| Prenol lipids                                  | 22 | Benzothiazines                         | 16 |

**Table S7. ClassyFire classification at the subclass level of the datasets used to train and test DeepCCS**

| Subclass                                   | Number | Subclass                                   | Number |
|--------------------------------------------|--------|--------------------------------------------|--------|
| Pterins and derivatives                    | 8      | Fatty aldehydes                            | 1      |
| Benzylethers                               | 2      | 1-hydroxy-2-unsubstituted benzenoids       | 2      |
| Chalcones and dihydrochalcones             | 1      | Pheniramines                               | 1      |
| Unknown                                    | 132    | Retinoids                                  | 3      |
| Delta valerolactones                       | 1      | Pyridinecarboxylic acids and derivatives   | 7      |
| Short-chain keto acids and derivatives     | 3      | Quinoline carboxylic acids                 | 2      |
| Dibenzoxazepines                           | 2      | Phosphosphingolipids                       | 1      |
| Anilides                                   | 9      | Phenylpiperidines                          | 3      |
| Cyclopyrrolones                            | 1      | Piperidinecarboxylic acids and derivatives | 2      |
| Gamma butyrolactones                       | 2      | Fatty acid esters                          | 9      |
| Phenylbutylamines                          | 4      | Fentanyl                                   | 1      |
| Quinone and hydroquinone lipids            | 6      | Steroid esters                             | 1      |
| Purine nucleotide sugars                   | 4      | Purine ribonucleotides                     | 18     |
| Diphenylmethanes                           | 21     | Carbazoles                                 | 3      |
| Pyridine carboxaldehydes                   | 3      | Imidazoles                                 | 8      |
| Hydroxyindoles                             | 2      | Carbonyl compounds                         | 19     |
| Pregnane steroids                          | 4      | Beta hydroxy acids and derivatives         | 4      |
| Sulfated steroids                          | 2      | Indolyl carboxylic acids and derivatives   | 5      |
| Monoterpenoids                             | 4      | Aminoquinolines and derivatives            | 2      |
| Organic pyrophosphates                     | 2      | N-phenylureas                              | 2      |
| Benzodifurans                              | 1      | Linear diarylheptanoids                    | 1      |
| Fatty acids and conjugates                 | 53     | Unclassified                               | 54     |
| Dicarboxylic acids and derivatives         | 3      | Gamma-keto acids and derivatives           | 2      |
| Terpene glycosides                         | 2      | Pyrazoles                                  | 3      |
| Galanthamine-type amaryllidaceae alkaloids | 1      | Aniline and substituted anilines           | 2      |
| Amino acids, peptides and analogues        | 195    | 1-benzopyrans                              | 2      |
| Hydroxypyridines                           | 1      | Beta lactams                               | 1      |
| Androstane steroids                        | 6      | Carboxylic acid derivatives                | 5      |
| O-methylated flavonoids                    | 5      | Styrenes                                   | 1      |
| Diterpenoids                               | 2      | Hydroxysteroids                            | 8      |

|                                         |    |                                            |    |
|-----------------------------------------|----|--------------------------------------------|----|
| Purines and purine derivatives          | 23 | Phenylpropanes                             | 3  |
| Benzenediols                            | 9  | Fatty acyl thioesters                      | 16 |
| Triradylglycerols                       | 1  | Vitamin D and derivatives                  | 1  |
| Purine deoxyribonucleotides             | 6  | Benzylisoquinolines                        | 1  |
| Pyrimidine nucleotide sugars            | 5  | Benzenesulfonamides                        | 17 |
| Indolines                               | 1  | Cholestane steroids                        | 3  |
| Trifluoromethylbenzenes                 | 2  | 1,3, 5-triazines                           | 2  |
| Bipyridines and oligopyridines          | 1  | O-methylated isoflavonoids                 | 3  |
| Benzoic acids and derivatives           | 31 | Flavones                                   | 5  |
| Purine 2-deoxyribonucleosides           | 3  | Alloxazines and isoalloxazines             | 1  |
| Medium-chain keto acids and derivatives | 2  | Quinolones and derivatives                 | 1  |
| Pyridoxamines                           | 2  | Aryl thioethers                            | 1  |
| Phosphate esters                        | 5  | Pyrimidine ribonucleotides                 | 6  |
| Halobenzenes                            | 10 | Aminophenyl ethers                         | 1  |
| 1-ribosyl-imidazolecarboxamides         | 1  | 5-deoxy-5-thionucleosides                  | 3  |
| Benzyl alcohols                         | 2  | Methoxybenzenes                            | 4  |
| Isoprenoid phosphates                   | 2  | 1-benzothiopyrans                          | 5  |
| Substituted pyrroles                    | 3  | Sulfanilides                               | 1  |
| Benzylpiperidines                       | 1  | Pyridoindoles                              | 1  |
| Indolecarboxylic acids and derivatives  | 1  | Dibenzothiazepines                         | 1  |
| Indoloquinolines                        | 1  | Flavonoid glycosides                       | 3  |
| Fatty acyl glycosides                   | 1  | Phenoxy compounds                          | 2  |
| Piperazines                             | 10 | Methoxyphenols                             | 8  |
| Bile acids, alcohols and derivatives    | 23 | Alpha-halocarboxylic acids and derivatives | 1  |
| Indoles                                 | 6  | Pyrimidine 2-deoxyribonucleosides          | 3  |
| Cinnamic acids                          | 2  | Glycerophosphoglycerols                    | 2  |
| Hydroxycinnamic acids and derivatives   | 4  | Tryptamines and derivatives                | 15 |
| Amines                                  | 21 | Glycerophosphocholines                     | 19 |
| Hydroxycoumarins                        | 3  | Pyrrolidinylpyridines                      | 1  |
| Carboximidic acids                      | 2  | Dibenzodiazepines                          | 2  |
| Porphyrins                              | 3  | Quaternary ammonium salts                  | 6  |
| Biflavonoids and polyflavonoids         | 1  | Lysergic acids and derivatives             | 1  |
| Anthraquinones                          | 1  | Steroid lactones                           | 1  |
| Xylenes                                 | 3  | Linoleic acids and derivatives             | 6  |
| Anisoles                                | 5  | Butyrophenones                             | 2  |
| 1, 4-benzodiazepines                    | 27 | Thiazoles                                  | 3  |
| Eicosanoids                             | 6  | Cyclohexylphenols                          | 1  |

|                                           |     |                                           |    |
|-------------------------------------------|-----|-------------------------------------------|----|
| Tricarboxylic acids and derivatives       | 6   | Dithiophosphate O-esters                  | 1  |
| Flavans                                   | 3   | Pyrimidines and pyrimidine derivatives    | 12 |
| Ureas                                     | 2   | Short-chain hydroxy acids and derivatives | 1  |
| Furanones                                 | 1   | Phenylacetamides                          | 1  |
| Phenylpyruvic acid derivatives            | 1   | Alpha hydroxy acids and derivatives       | 2  |
| Glycerophosphoethanolamines               | 13  | Steroidal glycosides                      | 1  |
| Triterpenoids                             | 1   | Tetracarboxylic acids and derivatives     | 1  |
| Carbohydrates and carbohydrate conjugates | 107 | Naphthoylindoles                          | 1  |
| Tyrosols and derivatives                  | 2   | Lipoamides                                | 1  |
| Glycerophosphates                         | 2   | Non-metal pyrophosphates                  | 1  |
| Benzenesulfonic acids and derivatives     | 1   | Nicotinamide nucleotides                  | 1  |
| Cyclic pyrimidine nucleotides             | 1   | Benzoylindoles                            | 1  |
| Ceramides                                 | 2   | Bilirubins                                | 2  |
| Sesquiterpenoids                          | 2   | Dibenzothiepins                           | 1  |
| Naphthoquinones                           | 2   | Pyrimidine deoxyribonucleotides           | 6  |
| Nicotinic acid nucleotides                | 1   | Benzodiazines                             | 2  |
| Biphenyls and derivatives                 | 2   | Dibenzoxepines                            | 2  |
| Glycerophosphoserines                     | 2   | 2,6-dimethyl-3-benzazocines               | 1  |
| Benzylamines                              | 1   | Cyclic purine nucleotides                 | 2  |
| Rotenoids                                 | 1   | Diradylglycerols                          | 1  |
| Hydropyridines                            | 4   | Pyridoxines                               | 2  |
| Alcohols and polyols                      | 8   | Estrane steroids                          | 4  |
| Guanidines                                | 2   | Isoflav-2-enes                            | 2  |
| Dibenzazepines                            | 7   | Organosulfonic acids and derivatives      | 1  |
| Phenothiazines                            | 14  | Morpholines                               | 1  |
| Glycosylglycerols                         | 1   | Phenethylamines                           | 5  |
| Hybrid peptides                           | 7   | Aminotriazines                            | 1  |
| Organic phosphonic acids                  | 1   | Arylsulfates                              | 2  |
| Glycosphingolipids                        | 2   |                                           |    |
